# Supplementary material for: Large-scale analysis of Arabidopsis transcription reveals a basal co-regulation network
Source: PubMed Central journal article supplement (PMC2944327; doi:10.1186/1752-0509-3-86), 2009-09-03
Supplement: 1752-0509-3-86-S1.pdf [file 1752-0509-3-86-S1.pdf]

## Additional data file 1

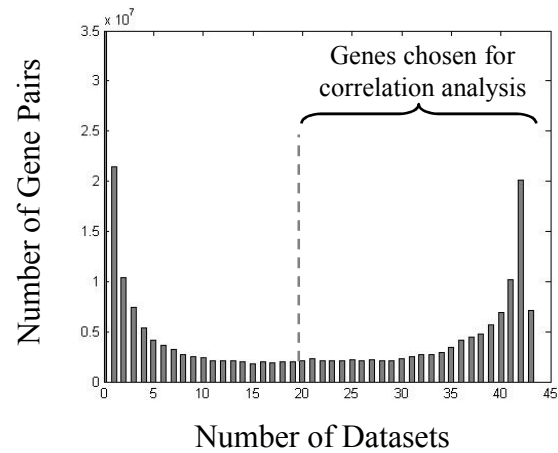

### **Distribution of the number of datasets in which each gene pair appears**

For each gene pair, the number of datasets in which they appear simultaneously was calculated. The data is plotted as a histogram showing the number of gene pairs exist per a specific number of datasets. Only gene pairs that appear in at least 20 datasets (dashed line) were used for further analysis.
