# Supplementary material for: Large-scale analysis of Arabidopsis transcription reveals a basal co-regulation network
Source: PubMed Central journal article supplement (PMC2944327; doi:10.1186/1752-0509-3-86), 2009-09-03
Supplement: 1752-0509-3-86-S2.pdf [file 1752-0509-3-86-S2.pdf]

## Additional data file 2

A

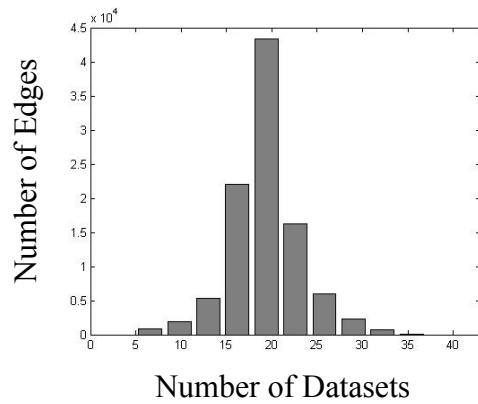

B

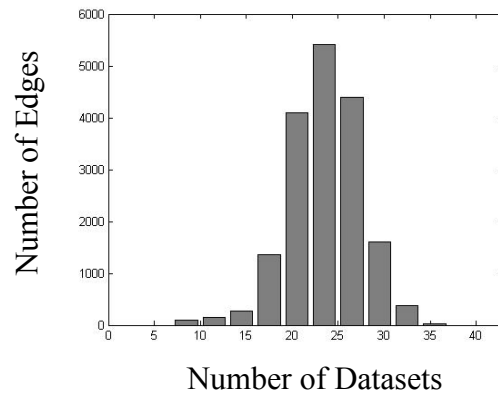

### **Distribution of the number of datasets that contribute to each edge**

For each edge connecting a pair of genes in the 0.3 (A) and 0.4 (B) networks, connecting a pair of genes, we calculated the number of datasets in which the two genes appear co-regulated. The data in the histogram shows the number of edges confirmed per number of datasets.
